# Supplementary material for: Li2Na2[B12O19(OH)2]: a new open framework borate with a pcu-type net constructed from large cyclic dodeca-oxoboron units
Source: Royal Society of Chemistry journal article supplement (doi:10.1039/c8ce02175a), 2019-01-01
Supplement: c8ce02175a1.pdf [file c8ce02175a1.pdf]

## Supporting Information

### **Li<sub>2</sub>Na<sub>2</sub>[B<sub>12</sub>O<sub>19</sub>(OH)<sub>2</sub>]: a new open framework borate with pcu-type net constructed by large cyclic dodeca-oxoboron units**

Bei-Bei Han,<sup>a</sup> Jian-Wen Cheng,<sup>\*b</sup> and Guo-Yu Yang,<sup>\*a</sup>

<sup>a</sup>MOE Key Laboratory of Cluster Science, School of Chemistry, Beijing Institute of Technology, Beijing 100081, China. E-mail: ygy@bit.edu.cn

<sup>b</sup>College of Chemistry and Life Sciences, Zhejiang Normal University, Jinhua, Zhejiang 321004, China. E-mail: jwcheng@zjnu.cn

**Figure S1.** The experimental and simulated PXRD patterns of **1**.

**Figure S2.** Asymmetric unit of **1**.

**Figure S3.** TG curve of compound **1** under air atmosphere (10 °C/min).

**Figure S4.** IR spectra of **1**.

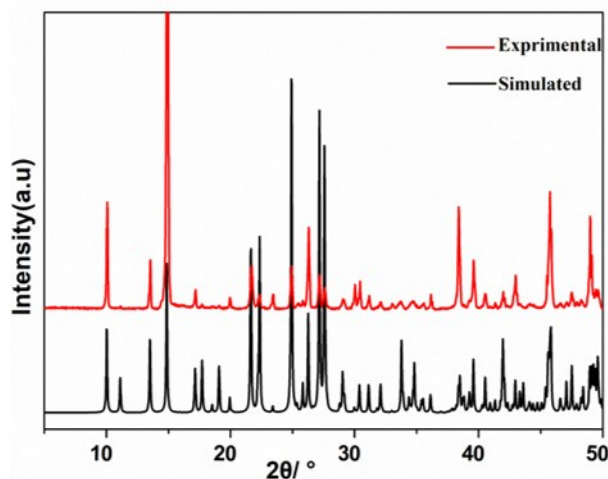

**Figure S1.** The experimental and simulated PXRD patterns of **1**.

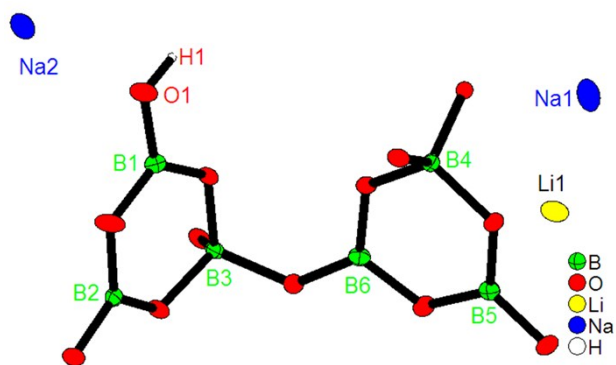

**Figure S2.** Asymmetric unit of **1**.

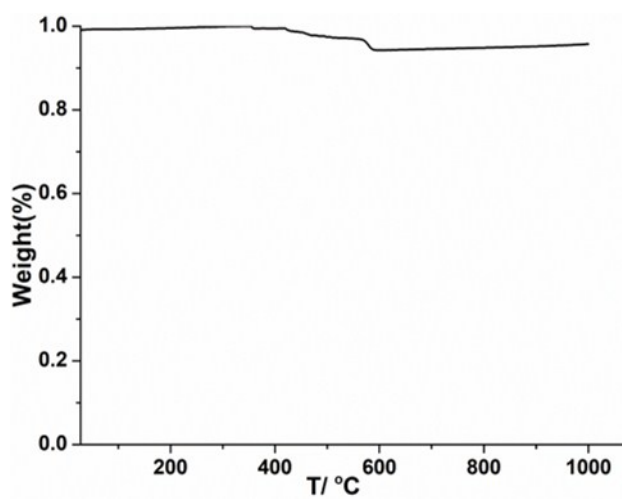

**Figure S3.** TG curve of compound **1** under air atmosphere (10 °C/min).

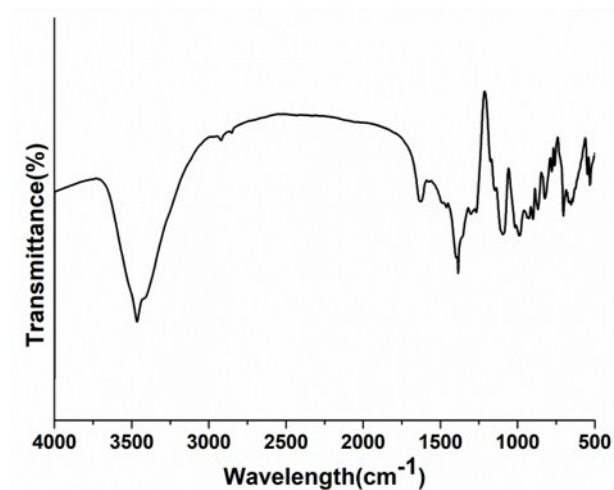

**Figure S4.** IR spectra of **1**.
